# Supplementary material
Source: PubMed Central journal article supplement (PMC2668823)
Supplement: NIHMS93995-supplement-2.pdf [file NIHMS93995-supplement-2.pdf]

## Supplemental material

### Supplementary Figure 1: Genotyping of *Apc*<sup>Min/+</sup> mice:

1: Genotyping of mouse tail DNA by PCR amplification identifies carriers of the *Apc*<sup>Min/+</sup> (presence of 340 bp band) alleles. The *Apc*<sup>Min/+</sup> locus was detected using the following primers: 5'-TTCCAACCTTTGGCATAAGGC-3', 5'-TTCTGAGAAAGACAGAAAGTTA-3'.

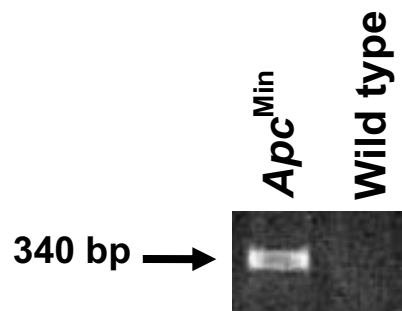

Supplementary Fig 2: PCR amplification of the neomycin cassette:

A) The presence of the neomycin insertion sequence in the genomic DNA of *Tgfb1*<sup>+/-</sup> mice from C57BL/6, *Apc*<sup>Min/+</sup>, and FVB backgrounds is confirmed by neomycin-specific PCR. PCR performed from genomic DNA of *Tgfb1*<sup>+/+</sup> mice produced no bands. This result confirms the presence of the neomycin sequence in the genomic DNA of haploinsufficient mice. (Neo, pIRES vector containing neomycin insertion sequence positive control)

B) Neomycin-specific PCR performed on cDNA from *Tgfb1*<sup>+/+</sup> and *Tgfb1*<sup>+/-</sup> mice from both C57BL/6 and FVB backgrounds shows that the inserted neomycin sequence is not transcribed, providing evidence that the disrupted *Tgfb1* allele is not expressed. GAPDH-specific PCR confirms cDNA quality is sufficient. (Neg, reaction with no template DNA; Neo, pIRES/neomycin positive control)

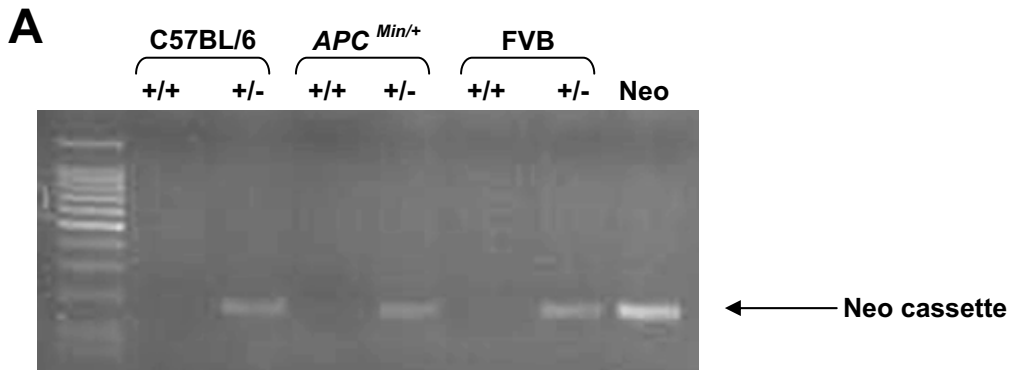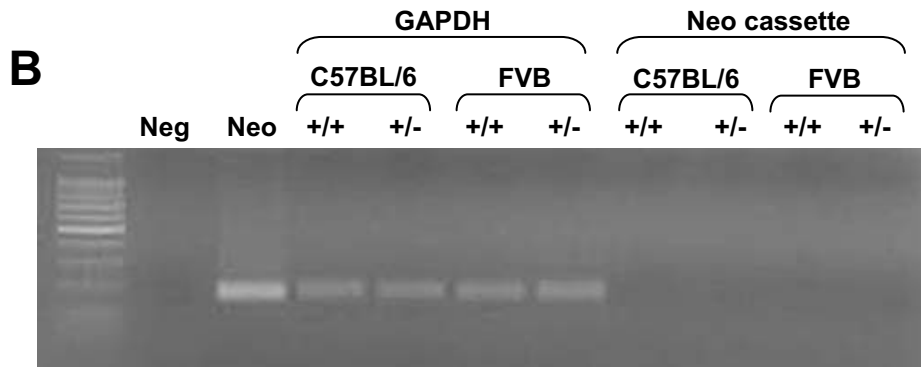

Supplementary Figure 3: Tumorigenesis of *Apc<sup>Min/+</sup>;Tgfr1<sup>+/+</sup>* and *Apc<sup>Min/+</sup>;Tgfr1<sup>+/-</sup>* mice:

Enlarged view from part of the colonic polypoid tumor shown in Fig. 2 D. Left arrow: central luminal necrosis. Right arrow: cribriform architecture with highly pleomorphic nuclei. Scale bar, 100  $\mu$ M.

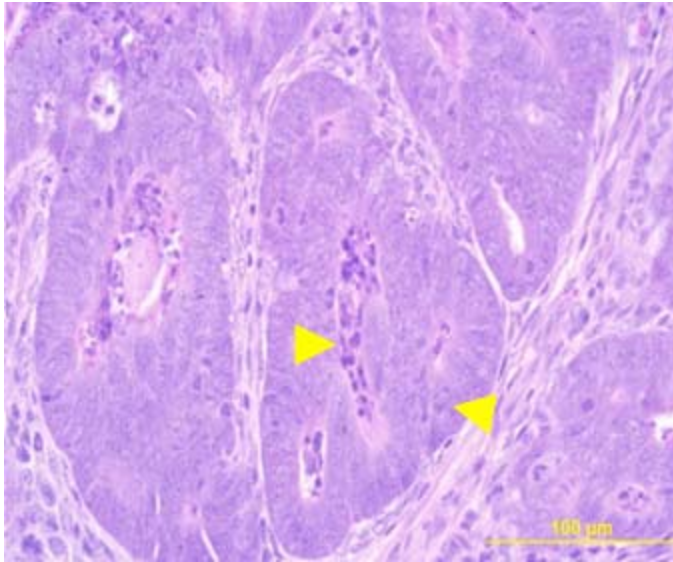

Supplementary Figure 4: Immunohistochemistry staining patterns of normal appearing small bowel tissues from  $Apc^{Min/+}; Tgfr1^{+/+}$  and  $Apc^{Min/+}; Tgfr1^{+/-}$  mice: Levels of proliferating cell nuclear antigen (PCNA) expression were significantly higher in  $Apc^{Min/+}; Tgfr1^{+/-}$  intestinal epithelial crypts (F,  $62.2 \pm 2.2\%$  of positive staining) (arrow) than in their wild type counterpart (E,  $44.4 \pm 2.8\%$  positive staining) (arrow) ( $p = 0.008$ ).

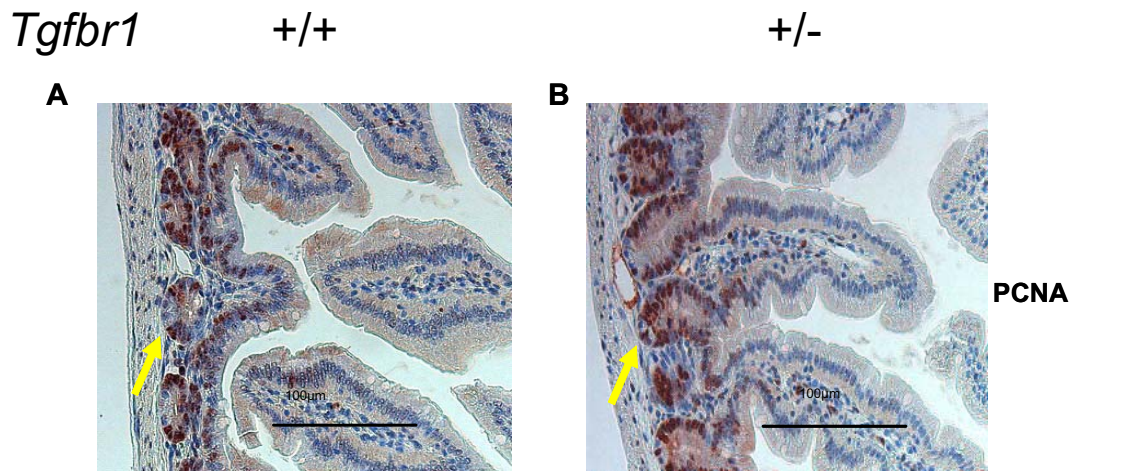

Supplementary Figure 5: Characterization of *Tgfbr1* haploinsufficiency on molecular signaling within tumors: Levels of proliferating cell nuclear antigen (PCNA) expression are significantly higher in *Apc<sup>Min/+</sup>; Tgfbr1<sup>+/-</sup>* tumors (A, 82.0 ± 2.9% of positive staining) than in their wild type counterpart (B, 48.2 ± 3.8% positive staining) (p = 0.0003) indicating increased cellular proliferation in vivo.

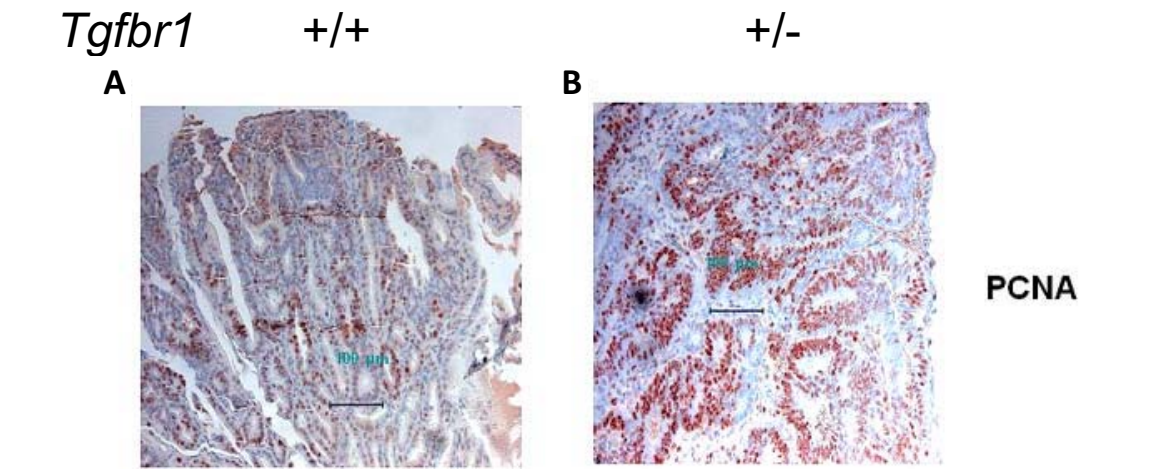

Supplementary Table 1: Backcrossing of *Tgfb1*<sup>+/-</sup> mice into C57BL6 background

F3 *Tgfb1*<sup>+/-</sup> mice described in the manuscript were backcrossed into the C57BL6/J background using speed congenics markers. Briefly, a minimum of 8 *Tgfb1*<sup>+/-</sup> animals from each generation of backcrossing were genotyped for 152 markers by the Jackson Laboratory (Bar Harbor, ME). Mice with the highest percentage of the host genome were backcrossed to the host for next generation. Two fully congenic F6 males (99.9% C57BL6/J) were confirmed using a full genome wide panel of 150 SNP markers (Jackson laboratory, Bar Harbor, ME). These two males were crossed with C57BL6/J females. Their female progeny was mated with *Apc*<sup>Min/+</sup> male mice (C57BL/6J) to generate pure C57BL6/J animals.

| SNP_ID         | CHR | Current_Position | MB_Position | RS_ID                      | Expected SNPs |     |
|----------------|-----|------------------|-------------|----------------------------|---------------|-----|
| JAX Stock #    |     |                  |             |                            | B6            | 129 |
| 01-005230167-M | 1   | 5,215,199        | 5.22        | <a href="#">rs3708040</a>  | C             | T   |
| 01-026072256-M | 1   | 25,731,275       | 25.73       | <a href="#">rs3717497</a>  | G             | T   |
| 01-046003967-M | 1   | 45,504,098       | 45.50       | <a href="#">rs3716368</a>  | A             | C   |
| 01-065042402-M | 1   | 64,459,042       | 64.46       | <a href="#">rs3024048</a>  | G             | A   |
| 01-086182722-M | 1   | 87,687,980       | 87.69       | <a href="#">rs4222507</a>  | A             | G   |
| 01-102073421-M | 1   | 103,425,685      | 103.43      | <a href="#">rs3684654</a>  | G             | C   |
| 01-122978406-M | 1   | 124,137,123      | 124.14      | <a href="#">rs3704842</a>  | G             | T   |
| 01-143006008-M | 1   | 143,991,782      | 143.99      | <a href="#">rs3710036</a>  | A             | G   |
| 01-162977516-M | 1   | 163,725,177      | 163.73      | <a href="#">rs3714825</a>  | G             | A   |
| 01-178701443-M | 1   | 179,305,169      | 179.31      |                            | A             | G   |
| 01-193173300-M | 1   | 193,617,817      | 193.62      | <a href="#">rs4137557</a>  | G             | A   |
| 02-003179310-M | 2   | 3,151,175        | 3.15        | <a href="#">rs13476360</a> | G             | A   |
| 02-020551513-M | 2   | 20,293,400       | 20.29       | <a href="#">rs13459063</a> | A             | G   |
| 02-041042651-M | 2   | 40,450,275       | 40.45       | <a href="#">rs3666514</a>  | C             | G   |
| 02-061161692-M | 2   | 60,302,386       | 60.30       | <a href="#">rs4223249</a>  | T             | C   |
| 02-078062303-M | 2   | 77,028,245       | 77.03       | <a href="#">rs3670874</a>  | T             | G   |
| 02-101074874-M | 2   | 99,962,752       | 99.96       | <a href="#">rs3686811</a>  | A             | G   |
| 02-119931810-M | 2   | 118,811,005      | 118.81      | <a href="#">rs13476789</a> | A             | T   |
| 02-139603599-M | 2   | 138,397,679      | 138.40      | <a href="#">rs13476861</a> | T             | A   |
| 02-161858323-M | 2   | 160,792,944      | 160.79      | <a href="#">rs4223706</a>  | C             | A   |
| 02-179086475-M | 2   | 180,489,599      | 180.49      | <a href="#">rs3698991</a>  | G             | T   |

|                |   |             |        |                            |   |   |
|----------------|---|-------------|--------|----------------------------|---|---|
| 03-011350737-M | 3 | 11,297,853  | 11.30  | <a href="#">rs3659585</a>  | G | C |
| 03-032431792-M | 3 | 32,477,107  | 32.48  | <a href="#">rs6246988</a>  | G | A |
| 03-053161686-M | 3 | 52,508,729  | 52.51  | <a href="#">rs3676567</a>  | T | C |
| 03-073214161-M | 3 | 72,409,948  | 72.41  | <a href="#">rs3688731</a>  | A | T |
| 03-088155864-N | 3 | 87,174,449  | 87.17  | <a href="#">rs3708141</a>  | T | C |
| 03-110268748-M | 3 | 109,572,245 | 109.57 | <a href="#">rs3659645</a>  | C | T |
| 03-131286062-N | 3 | 130,432,706 | 130.43 | <a href="#">rs3677005</a>  | C | T |
| 03-151125653-M | 3 | 150,231,659 | 150.23 | <a href="#">rs13477603</a> | A | T |
| 03-160287200-M | 3 | 159,329,523 | 159.33 | <a href="#">rs3706812</a>  | G | A |
| 04-003163167-M | 4 | 3,649,668   | 3.65   | <a href="#">rs3703981</a>  | G | T |
| 04-022875524-M | 4 | 23,212,481  | 23.21  | <a href="#">rs3654495</a>  | C | T |
| 04-043070534-M | 4 | 44,245,673  | 44.25  | <a href="#">rs3726519</a>  | A | G |
| 04-065107790-M | 4 | 67,443,152  | 67.44  | <a href="#">rs3672377</a>  | G | C |
| 04-084241978-M | 4 | 86,563,736  | 86.56  | <a href="#">rs13477946</a> | T | C |
| 04-106314110-M | 4 | 108,237,002 | 108.24 | <a href="#">rs3724911</a>  | C | A |
| 04-120122875-M | 4 | 122,489,120 | 122.49 | <a href="#">rs13478101</a> | G | A |
| 04-141084977-M | 4 | 142,898,789 | 142.90 | <a href="#">rs3693853</a>  | A | G |
| 04-151168886-M | 4 | 155,091,989 | 155.09 | <a href="#">rs13478208</a> | G | T |
| 05-003188964-M | 5 | 10,671,078  | 10.67  | <a href="#">rs3671776</a>  | C | T |
| 05-023890459-M | 5 | 24,922,231  | 24.92  | <a href="#">rs3666143</a>  | C | G |
| 05-044010971-M | 5 | 45,444,992  | 45.44  | <a href="#">rs3657487</a>  | T | G |
| 05-065734378-N | 5 | 67,053,321  | 67.05  | <a href="#">rs3719351</a>  | A | G |
| 05-084120220-M | 5 | 84,999,770  | 85.00  | <a href="#">rs3141573</a>  | G | T |
| 05-106058057-M | 5 | 108,807,704 | 108.81 | <a href="#">rs4225658</a>  | T | C |
| 05-125054661-M | 5 | 127,277,828 | 127.28 | <a href="#">rs13478656</a> | T | C |
| 05-139966164-M | 5 | 141,533,535 | 141.53 | <a href="#">rs3699842</a>  | T | C |
| 05-149044358-M | 5 | 150,598,041 | 150.60 | <a href="#">rs4225867</a>  | C | A |
| 06-003167392-M | 6 | 3,416,870   | 3.42   | <a href="#">rs3023069</a>  | C | T |
| 06-020075608-M | 6 | 20,086,996  | 20.09  | <a href="#">rs3671401</a>  | T | G |
| 06-045126062-M | 6 | 44,823,195  | 44.82  | <a href="#">rs3691330</a>  | A | G |
| 06-062599520-M | 6 | 62,010,344  | 62.01  | <a href="#">rs3684245</a>  | A | G |
| 06-083216741-M | 6 | 82,284,691  | 82.28  | <a href="#">rs8268650</a>  | G | T |
| 06-103313512-M | 6 | 102,435,179 | 102.44 | <a href="#">rs3714392</a>  | C | T |
| 06-122941044-M | 6 | 121,990,121 | 121.99 | <a href="#">rs13479217</a> | T | A |
| 06-135955068-M | 6 | 135,557,845 | 135.56 | <a href="#">rs13479279</a> | C | A |
| 06-149052281-M | 6 | 148,260,469 | 148.26 | <a href="#">rs3679035</a>  | C | G |
| 07-004201219-N | 7 | 4,796,809   | 4.80   | <a href="#">rs3686423</a>  | A | G |
| 07-022997618-M | 7 | 31,508,107  | 31.51  | <a href="#">rs3710857</a>  | C | T |
| 07-044964980-M | 7 | 62,576,551  | 62.58  | <a href="#">rs3684285</a>  | G | C |
| 07-065183517-M | 7 | 82,850,465  | 82.85  | <a href="#">rs3700241</a>  | G | T |
| 07-085095955-M | 7 | 102,503,409 | 102.50 | <a href="#">rs3023177</a>  | C | T |
| 07-106153798-M | 7 | 123,671,703 | 123.67 | <a href="#">rs3653751</a>  | G | T |
| 07-135345950-N | 7 | 152,082,670 | 152.08 | <a href="#">rs3696502</a>  | A | G |
| 08-003089774-M | 8 | 3,189,168   | 3.19   | <a href="#">rs3699199</a>  | T | C |
| 08-025034424-M | 8 | 27,414,184  | 27.41  | <a href="#">rs13479965</a> | C | T |
| 08-045080531-M | 8 | 47,006,288  | 47.01  | <a href="#">rs4227429</a>  | T | C |

|                |    |             |        |                            |   |   |
|----------------|----|-------------|--------|----------------------------|---|---|
| 08-067470102-N | 8  | 70,607,462  | 70.61  | <a href="#">rs13480101</a> | G | C |
| 08-086985036-M | 8  | 89,791,885  | 89.79  | <a href="#">rs3705734</a>  | C | T |
| 08-107088585-M | 8  | 109,771,826 | 109.77 | <a href="#">rs3685575</a>  | A | G |
| 08-123340602-N | 8  | 125,792,617 | 125.79 | <a href="#">rs3705676</a>  | C | T |
| 09-003938578-M | 9  | 4,020,321   | 4.02   | <a href="#">rs3698994</a>  | T | C |
| 09-016198772-M | 9  | 16,021,041  | 16.02  | <a href="#">rs3696932</a>  | G | T |
| 09-037129176-M | 9  | 36,759,904  | 36.76  | <a href="#">rs4227968</a>  | T | C |
| 09-057114504-M | 9  | 56,434,767  | 56.43  | <a href="#">rs4228121</a>  | C | T |
| 09-077792491-M | 9  | 76,938,604  | 76.94  | <a href="#">rs13480582</a> | T | A |
| 09-098865563-M | 9  | 98,249,448  | 98.25  | <a href="#">rs13480625</a> | T | C |
| 09-115037423-M | 9  | 113,824,128 | 113.82 | <a href="#">rs3717445</a>  | G | A |
| 09-125082704-M | 9  | 123,551,657 | 123.55 | <a href="#">rs3713441</a>  | G | A |
| 10-003233934-M | 10 | 6,998,239   | 7.00   | <a href="#">rs4228405</a>  | G | C |
| 10-023127952-M | 10 | 22,906,845  | 22.91  | <a href="#">rs3151132</a>  | A | G |
| 10-043132794-M | 10 | 42,763,592  | 42.76  | <a href="#">rs3685856</a>  | T | G |
| 10-053898997-M | 10 | 53,462,955  | 53.46  | <a href="#">rs4228622</a>  | G | C |
| 10-092128703-M | 10 | 91,386,428  | 91.39  | <a href="#">rs3673679</a>  | G | A |
| 10-115062433-M | 10 | 114,294,228 | 114.29 | <a href="#">rs3663879</a>  | T | C |
| 10-129117100-M | 10 | 127,890,188 | 127.89 | <a href="#">rs3090050</a>  | G | A |
| 11-004367508-M | 11 | 4,408,733   | 4.41   | <a href="#">rs13481176</a> | G | A |
| 11-024515722-M | 11 | 24,386,229  | 24.39  | <a href="#">rs3726373</a>  | G | A |
| 11-047224208-M | 11 | 46,666,864  | 46.67  | <a href="#">rs3719031</a>  | C | A |
| 11-070331570-M | 11 | 69,560,965  | 69.56  | <a href="#">rs3665793</a>  | T | C |
| 11-090199967-M | 11 | 89,314,273  | 89.31  | <a href="#">rs3707048</a>  | T | C |
| 11-111226923-M | 11 | 110,246,168 | 110.25 | <a href="#">rs6288403</a>  | A | C |
| 11-122195777-M | 11 | 121,116,553 | 121.12 | <a href="#">rs3692977</a>  | C | T |
| 12-003567042-M | 12 | 3,701,820   | 3.70   | <a href="#">rs13481630</a> | G | T |
| 12-022232159-M | 12 | 28,835,162  | 28.84  | <a href="#">rs13481675</a> | C | G |
| 12-041270227-M | 12 | 48,020,093  | 48.02  | <a href="#">rs13481736</a> | A | G |
| 12-061271925-M | 12 | 67,818,222  | 67.82  | <a href="#">rs3090002</a>  | A | T |
| 12-084289638-M | 12 | 91,408,395  | 91.41  | <a href="#">rs3677220</a>  | C | A |
| 12-107536049-N | 12 | 114,496,728 | 114.50 | <a href="#">rs3695655</a>  | A | G |
| 12-113315003-M | 12 | 120,327,443 | 120.33 | <a href="#">rs13481991</a> | C | G |
| 13-003966099-M | 13 | 4,160,601   | 4.16   | <a href="#">rs13482000</a> | A | G |
| 13-023105764-M | 13 | 23,788,316  | 23.79  | <a href="#">rs3689508</a>  | A | G |
| 13-043995023-N | 13 | 44,496,918  | 44.50  | <a href="#">rs13482109</a> | T | G |
| 13-065339791-N | 13 | 67,941,214  | 67.94  | <a href="#">rs3659053</a>  | C | T |
| 13-084819885-M | 13 | 87,813,907  | 87.81  | <a href="#">rs4230429</a>  | G | A |
| 13-105849719-M | 13 | 109,214,086 | 109.21 | <a href="#">rs3666178</a>  | A | G |
| 13-117094028-M | 13 | 120,254,901 | 120.25 | <a href="#">rs3712154</a>  | G | A |
| 14-003066925-M | 14 | 8,613,747   | 8.61   | <a href="#">rs13482383</a> | T | C |
| 14-020426806-M | 14 | 26,162,806  | 26.16  | <a href="#">rs3681808</a>  | A | G |
| 14-040017031-M | 14 | 48,792,639  | 48.79  | <a href="#">rs3091175</a>  | G | C |
| 14-060626617-N | 14 | 70,097,369  | 70.10  | <a href="#">rs4230721</a>  | T | C |
| 14-077156430-M | 14 | 86,443,660  | 86.44  | <a href="#">rs3088560</a>  | C | T |
| 14-097042967-M | 14 | 106,254,320 | 106.25 | <a href="#">rs3707104</a>  | A | G |



|                |    |             |        |                            |   |   |
|----------------|----|-------------|--------|----------------------------|---|---|
| 14-114403652-M | 14 | 123,545,419 | 123.55 | <a href="#">rs4161857</a>  | C | T |
| 15-003094890-M | 15 | 3,219,262   | 3.22   | <a href="#">rs4163058</a>  | A | G |
| 15-020280219-M | 15 | 20,138,467  | 20.14  | <a href="#">rs4171393</a>  | G | T |
| 15-041051689-M | 15 | 40,708,090  | 40.71  | <a href="#">rs4190619</a>  | G | C |
| 15-057561875-M | 15 | 56,992,041  | 56.99  | <a href="#">rs4205765</a>  | A | G |
| 15-083914758-M | 15 | 82,956,832  | 82.96  | <a href="#">rs13482876</a> | A | G |
| 15-102788257-N | 15 | 101,641,254 | 101.64 | <a href="#">rs4135869</a>  | G | T |
| 16-005053446-C | 16 | 5,596,485   | 5.60   | <a href="#">rs3690712</a>  | G | T |
| 16-025179119-C | 16 | 25,407,388  | 25.41  | <a href="#">rs3710986</a>  | G | C |
| 16-045078790-C | 16 | 45,037,164  | 45.04  | <a href="#">rs3688141</a>  | G | A |
| 16-066862514-C | 16 | 66,406,352  | 66.41  | <a href="#">rs3023460</a>  | T | G |
| 16-090091107-C | 16 | 89,451,584  | 89.45  | <a href="#">rs3714233</a>  | C | A |
| 16-096070057-C | 16 | 95,329,654  | 95.33  | <a href="#">rs4231786</a>  | C | T |
| 17-003335010-M | 17 | 5,885,430   | 5.89   | <a href="#">rs3683436</a>  | G | C |
| 17-023157746-M | 17 | 24,105,207  | 24.11  | <a href="#">rs3719627</a>  | A | T |
| 17-045146746-M | 17 | 46,262,961  | 46.26  | <a href="#">rs3656292</a>  | A | T |
| 17-065545592-M | 17 | 66,770,664  | 66.77  | <a href="#">rs4232042</a>  | T | C |
| 17-084615613-M | 17 | 85,718,538  | 85.72  | <a href="#">rs3704503</a>  | G | A |
| 17-092673068-N | 17 | 93,598,958  | 93.60  | <a href="#">rs3679049</a>  | T | G |
| 18-005066417-M | 18 | 5,207,638   | 5.21   | <a href="#">rs3160376</a>  | T | C |
| 18-022777507-M | 18 | 22,828,204  | 22.83  | <a href="#">rs13483720</a> | G | T |
| 18-043081750-M | 18 | 43,083,464  | 43.08  | <a href="#">rs13483769</a> | C | T |
| 18-065947946-M | 18 | 65,769,364  | 65.77  | <a href="#">rs3675552</a>  | T | G |
| 18-078813035-M | 18 | 78,443,851  | 78.44  | <a href="#">rs13483915</a> | A | C |
| 18-090060367-M | 18 | 89,629,192  | 89.63  | <a href="#">rs3653678</a>  | G | T |
| 19-018239318-M | 19 | 18,669,375  | 18.67  | <a href="#">rs3697198</a>  | T | G |
| 19-038092479-M | 19 | 38,517,304  | 38.52  | <a href="#">rs3716904</a>  | T | C |
| 19-049914266-M | 19 | 50,050,644  | 50.05  |                            | G | T |
| 19-060823449-N | 19 | 60,842,385  | 60.84  |                            | A | G |
| X-016114535-G  | X  | 17,889,948  | 17.89  | <a href="#">rs13483721</a> | C | A |
| X-025132696-G  | X  | 36,252,886  | 36.25  | <a href="#">rs13483729</a> | C | G |
| X-052681018-M  | X  | 66,761,135  | 66.76  | <a href="#">rs3707564</a>  | A | C |
| X-060478145-M  | X  | 74,709,915  | 74.71  | <a href="#">rs3663719</a>  | A | T |
| X-068494838-M  | X  | 82,748,657  | 82.75  | <a href="#">rs3664154</a>  | C | T |
| X-087817653-G  | X  | 100,102,202 | 100.10 | <a href="#">rs13483918</a> | A | T |
| X-100413449-M  | X  | 114,022,081 | 114.02 | <a href="#">rs3690903</a>  | T | G |
| X-115587169-N  | X  | 132,749,158 | 132.75 | <a href="#">rs4151956</a>  | T | C |
| X-133535206-G  | X  | 150,081,739 | 150.08 | <a href="#">rs13484074</a> | T | C |
| X-143466659-M  | X  | 162,753,251 | 162.75 | <a href="#">rs3698078</a>  | A | C |

Supplementary Table 2: Analysis of *Tgfbr1* LOH in tumors

Normalized LOH ratio values calculated after analysis by SNaPshot of six colonic tumors from three *Apc*<sup>Min+</sup>;*Tgfbr1*<sup>+/-</sup> mice. The values shown in the Table below represent the averages of the ratios obtained with two different SNPs located within the *Tgfbr1* gene: rs32739456 and rs32428765, and their corresponding standard deviations (SD).

| Mean LOH ratio | S.D. |
|----------------|------|
| 0.89           | 0.03 |
| 0.88           | 0.13 |
| 1.07           | 0.03 |
| 1.09           | 0.05 |
| 0.97           | 0.08 |
| 1.01           | 0.05 |
